# Supplementary material
Source: PubMed Central journal article supplement (PMC4271547)
Supplement: NIHMS647828-supplement-Supplemental_Fig_1.pdf [file NIHMS647828-supplement-Supplemental_Fig_1.pdf]

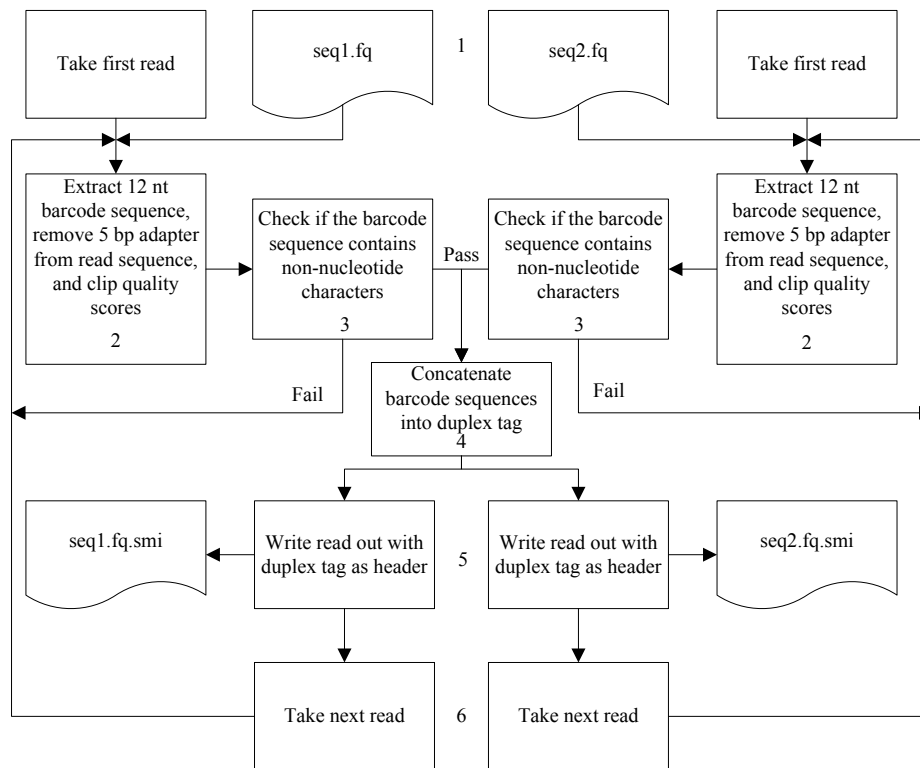

### Algorithm for tag\_to\_header.py

The `tag_to_header.py` program proceeds through the two raw FASTQ files in parallel with in-register reads for the read 1 and read 2 files being processed simultaneously. The first 17-nt of each read consists of a 12-nt random tag, followed by an invariant five base spacer sequence (Figure 1A). Prior to extracting the tag sequence, reads can be optionally filtered on the presence of a valid adapter sequence (i.e. having the sequence TGACT) (Step 2). If one or both reads have a spacer that fails this optional filter, the entire read pair is ignored. It should be noted that using this option on data from a low quality sequencing run can lead to a significant loss of data. We rarely invoke this option in our data analysis pipeline. Next, the two 12-nt tag sequences and the invariant 5-nt spacer sequence are parsed from each of the paired reads (Step 3). The tags are checked to ensure that they are only composed of valid nucleotides (A, G, C, or T) (Step 4). If a tag fails this filter, both read pairs sharing the tag are discarded. If both tags pass the basic quality filter, the final duplex tag is formed by concatenated the 12-nt tag from read 2 (i.e. `seq2.fq`) to the 12-nt tag from read 1 (`seq1.fq`) (Step 5). For example, if the `seq1.fq` barcode sequence is ‘AGCT’ (the remaining bases of the tag are removed for clarity) the `seq2.fq` barcode sequence is CCAT, the resulting duplex tag is AGCTCCAT. The read is then written out to a new FASTQ file (`seq1.fq.smi`) with the duplex tag appended to the header region (Step 6).
