# Supplementary material
Source: PubMed Central journal article supplement (PMC4271547)
Supplement: NIHMS647828-supplement-Supplemental_Fig_6.pdf [file NIHMS647828-supplement-Supplemental_Fig_6.pdf]

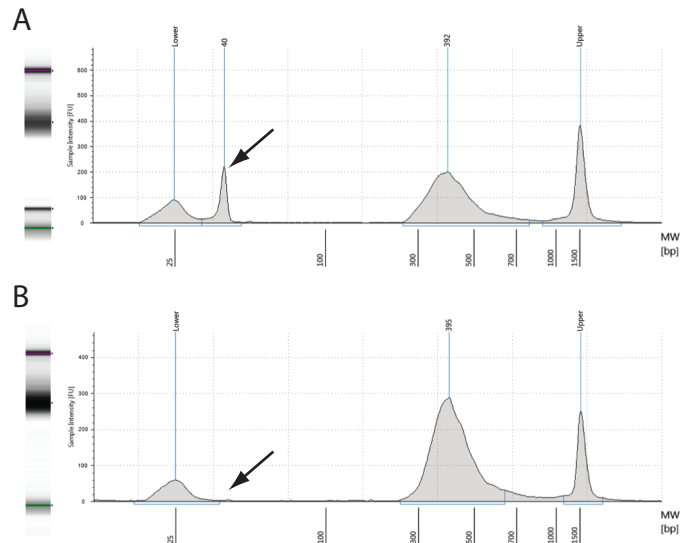

**Removal of PCR contaminants by AMPure XP bead purification. (a)** Electropherogram and associated size profile shows the presence of a PCR contaminant prior to the bead cleanup step. **(b)** Bead cleanup of the same sample removes the PCR contaminant. The arrow denotes the contaminant. We typically use a 1.2X bead:DNA ratio (vol:vol) of beads to select against these low molecular weight products.
