# Supplementary material
Source: PubMed Central journal article supplement (PMC4271547)
Supplement: NIHMS647828-supplement-Supplemental_Table_1.pdf [file NIHMS647828-supplement-Supplemental_Table_1.pdf]

**Supplemental Table 1. Redesigned dA-tailed adapters results in increased DS data yield.**

|          | <b>Adapter<br/>Overhang<br/>Base ID</b> | <b># Starting<br/>Reads</b> | <b># SSCS<br/>Reads</b> | <b># DCS<br/>Reads</b> | <b>Peak<br/>Family Size</b> | <b>% Increase<br/>in DCS Reads</b> |
|----------|-----------------------------------------|-----------------------------|-------------------------|------------------------|-----------------------------|------------------------------------|
| Sample 1 | dA (old)                                | 8.9x10 <sup>6</sup>         | 3.8x10 <sup>5</sup>     | 2.7x10 <sup>4</sup>    | 23                          | 78%                                |
|          | dT (new)                                | 7.4x10 <sup>6</sup>         | 4.3x10 <sup>5</sup>     | 4.8x10 <sup>4</sup>    | 17                          |                                    |
| Sample 2 | dA (old)                                | 5.6x10 <sup>6</sup>         | 9.4x10 <sup>5</sup>     | 6.4x10 <sup>4</sup>    | 6                           | 500%                               |
|          | dT (new)                                | 7.8x10 <sup>6</sup>         | 1.7x10 <sup>6</sup>     | 3.2x10 <sup>5</sup>    | 5                           |                                    |

Data are from the same original DNA sample, but prepared and sequenced on two different days. The DNA was processed as described in the PROCEDURE section. A 20X molar excess of adapters was used for the ligation and 40 amoles of DNA was used for the PCR amplification step (PROCEDURE Step 38).
