# Supplementary material
Source: PubMed Central journal article supplement (PMC4271547)
Supplement: NIHMS647828-supplement-Supplemental_Table_2.pdf [file NIHMS647828-supplement-Supplemental_Table_2.pdf]

**Supplemental Table 2. Relative lane fraction needed to achieve optimal data on an under-duplicated sample.**

| <b>If your peak family size is...</b> | <b>Re-run the sample on this relative lane fraction*</b>                                                   |
|---------------------------------------|------------------------------------------------------------------------------------------------------------|
| >12-16                                | Family size too large. On future experiments, use larger amount of input DNA for PCR (see TROUBLESHOOTING) |
| 5-11                                  | family size already optimal                                                                                |
| 4                                     | .5X                                                                                                        |
| 3                                     | 1X                                                                                                         |
| 2                                     | 2X                                                                                                         |
| 1                                     | Repeat PCR with 6X less input DNA                                                                          |

\*As an example, suppose a sample was sequenced with 8,000,000 paired-reads, which resulted in a peak family size of 2. To increase the peak family size to 6, re-run the sample on  $8,000,000 * 2 = 16,000,000$  reads of a lane and then pool the raw reads from both sequencing runs and reprocess according to the PROCEDURE section. This will give a final peak family size of  $2 + 4 = 6$ .
